# Supplementary material for: Safety, Pharmacokinetic and Pharmacodynamic Evaluation of Teverelix for the Treatment of Hormone-Sensitive Advanced Prostate Cancer: Phase 2 Loading-Dose-Finding Studies
Source: MDPI journal article supplement (doi:10.3390/medicina59040681), 2023-03-29
Supplement: s1 [file s1]

**Supplemental Table S1. Summary of the 5 Phase 2 clinical trials**

|                                           | <b>EP-24332T-A013</b>                                                                                                                                                                                                                                                                                                                                                                                                                                                                                                                                                                                                                                                                                                                                                                                                                                                                                                                                                                      | <b>EP-24332T-A014</b>                               | <b>ARD-0301-003</b>                                | <b>ARD-0301-008</b>                              | <b>ARD-0301-010</b>                                                                                                                                     |
|-------------------------------------------|--------------------------------------------------------------------------------------------------------------------------------------------------------------------------------------------------------------------------------------------------------------------------------------------------------------------------------------------------------------------------------------------------------------------------------------------------------------------------------------------------------------------------------------------------------------------------------------------------------------------------------------------------------------------------------------------------------------------------------------------------------------------------------------------------------------------------------------------------------------------------------------------------------------------------------------------------------------------------------------------|-----------------------------------------------------|----------------------------------------------------|--------------------------------------------------|---------------------------------------------------------------------------------------------------------------------------------------------------------|
| <b>EudraCT No.</b>                        | Not Applicable*                                                                                                                                                                                                                                                                                                                                                                                                                                                                                                                                                                                                                                                                                                                                                                                                                                                                                                                                                                            | 2004-001648-64                                      | 2005-002100-42                                     | 2005-005742-39                                   | 2006-004572-13                                                                                                                                          |
| <b>Ethics: IEC and reference no.</b>      | Lithuanian Bioethics Committee: 2004-03-31 No. 30/2                                                                                                                                                                                                                                                                                                                                                                                                                                                                                                                                                                                                                                                                                                                                                                                                                                                                                                                                        | Lithuanian Bioethics Committee: 2004-09-01 No. 46/1 | Lithuanian Bioethics Committee: 2005-07-013 No. 47 | Lithuanian Bioethics Committee: 2006-01-26 No. 4 | Lithuanian Bioethics Committee: 1. 2007-02-21 No. 10<br><br>IEC for investigation of drugs and pharmaceutical products (Republic of Latvia): 190916-120 |
| Study design                              | Phase 2, open label study investigating the pharmacokinetics, pharmacodynamics, efficacy and safety of a loading dose regimen <b>teverelix</b> in patients with advanced prostate cancer                                                                                                                                                                                                                                                                                                                                                                                                                                                                                                                                                                                                                                                                                                                                                                                                   |                                                     |                                                    |                                                  |                                                                                                                                                         |
|                                           | Multi centre                                                                                                                                                                                                                                                                                                                                                                                                                                                                                                                                                                                                                                                                                                                                                                                                                                                                                                                                                                               | Multi centre                                        | Single centre                                      | Single centre                                    | Multi centre                                                                                                                                            |
| Administration (dose, route, schedule); n | 90 mg SC; D0,1,2; n=14                                                                                                                                                                                                                                                                                                                                                                                                                                                                                                                                                                                                                                                                                                                                                                                                                                                                                                                                                                     | 90 mg IM; D0, D7; n=14                              | 120 mg SC; D0, D1; n=8                             | 120 (2x60) mg SC; D0, D1; n=8                    | 120 (2x60) mg SC; D0, D1, D2; n=18<br>180 (2x90) mg SC; D0, D1, D2; n=20                                                                                |
| Inclusion criteria                        | <ul style="list-style-type: none"> <li>Histologically proven adenocarcinoma of the prostate</li> <li>Androgen deprivation therapy suitable (advanced prostate cancer i.e. with local invasion or/and metastasis)</li> <li>Signed written informed consent</li> </ul>                                                                                                                                                                                                                                                                                                                                                                                                                                                                                                                                                                                                                                                                                                                       |                                                     |                                                    |                                                  |                                                                                                                                                         |
| Exclusion criteria                        | <ul style="list-style-type: none"> <li>Liver or renal function tests (ASAT/SGOT, ALAT/SGPT, total bilirubin, creatinine) exceeding twice the upper limit of the normal range, unless the elevation is attributed to hepatic metastasis</li> <li>Any contraindication to the use of <b>teverelix</b></li> <li>Life expectancy of less than 1 year</li> <li>Baseline testosterone value below 2.31 ng/ml</li> <li>Bilateral orchidectomy</li> <li>Pre-existing hormone therapy or planned concomitant use of androgen deprivation therapy with any agent other than the investigational drug</li> <li>Neurological, psychiatric disease, drug or alcohol abuse which could interfere with the subject's proper compliance</li> <li>Evidence of concurrent malignancy</li> <li>Exposure to another investigational agent within the last month</li> <li>Lack of ability or willingness to give informed consent</li> <li>Anticipated non-availability for study visits/ procedures</li> </ul> |                                                     |                                                    |                                                  |                                                                                                                                                         |

|                     | EP-24332T-A013                                                                                                                                                                                                                                                                                                                                                                                                                                                                                                                                                                                                                                                                            | EP-24332T-A014 | ARD-0301-003 | ARD-0301-008 | ARD-0301-010 |
|---------------------|-------------------------------------------------------------------------------------------------------------------------------------------------------------------------------------------------------------------------------------------------------------------------------------------------------------------------------------------------------------------------------------------------------------------------------------------------------------------------------------------------------------------------------------------------------------------------------------------------------------------------------------------------------------------------------------------|----------------|--------------|--------------|--------------|
| Primary objective   | To assess the duration of action of an initial "loading" dose regimen of Teverelix LA in terms of suppression of testosterone to below castrate level (0.5 ng/ml)                                                                                                                                                                                                                                                                                                                                                                                                                                                                                                                         |                |              |              |              |
| Secondary objective | To assess: <ul style="list-style-type: none"> <li>Pharmacodynamics of teverelix in terms of ability to suppress and to maintain plasma testosterone levels below castration level (&lt; 0.5ng/ml) until (after week 3) 2 consecutive, increasing testosterone levels above castration level with the latter one above 2 ng/ml, have been recorded.</li> <li>Effects on Luteinizing Hormone (LH)</li> <li>Effects on Prostate Specific Antigen (PSA)</li> <li>Safety of teverelix LA in terms of :               <ul style="list-style-type: none"> <li>local tolerability and</li> <li>systemic tolerability (adverse events and changes in laboratory parameters)</li> </ul> </li> </ul> |                |              |              |              |

D=day; IEC=Independent Ethics Committee; IM=intramuscular; SC=subcutaneous

Testosterone 0.5 ng/ml=2 nmol/l

\* Pre-dated requirement for clinical trial registration

**Supplemental Table S2. Pharmacokinetic data for teverelix DP**

| Parameter                         | EP-24332T-A013              | EP-24332T-A014                                    | Parameter                                    | ARD-0301-003                 | ARD-0301-008                        | ARD-0301-010                             |                                          |
|-----------------------------------|-----------------------------|---------------------------------------------------|----------------------------------------------|------------------------------|-------------------------------------|------------------------------------------|------------------------------------------|
| Treatment                         | 90 mg SC;<br>D0,1,2<br>n=14 | 90 mg IM;<br>D0, D7;<br>n=14                      | Treatment                                    | 120 mg SC;<br>D0, D1;<br>n=8 | 120 (2x60) mg SC;<br>D0, D1;<br>n=8 | 120 (2x60) mg SC;<br>D0, D1, D2;<br>n=18 | 180 (2x90) mg SC;<br>D0, D1, D2;<br>n=20 |
| C <sub>max</sub> (obs)<br>(ng/mL) | 12.86<br>(41.2)             | Dose 1: 21.5<br>(69.5)<br>Dose 2: 38.0<br>(33.8)  | C <sub>max</sub> <sub>Init1</sub><br>(ng/mL) | 13.6<br>(35.5)               | 19.6 (47.1)                         | 17.9 (67.8)                              | 36.6 (194.0)                             |
| AUC(0-t)<br>(ng.h/mL)             | 197.0<br>(32.9)             | Dose 1: 1734<br>(101.1)<br>Dose 2: 8355<br>(22.2) | C <sub>max</sub> <sub>Init2</sub><br>(ng/mL) | 17.9<br>(27.1)               | 24.0 (29.2)                         | 28.4 (112.0)                             | 38.8 (71.0)                              |
| AUC(0-∞)                          | -                           | Dose 1: 4610                                      | C <sub>max</sub> <sub>Init3</sub>            | NA                           | NA                                  | 30.5 (58.1)                              | 48.2 (133.0)                             |

| Parameter                       | EP-24332T-A013                | EP-24332T-A014                                                 | Parameter                         | ARD-0301-003                 | ARD-0301-008                        | ARD-0301-010                             |                                          |
|---------------------------------|-------------------------------|----------------------------------------------------------------|-----------------------------------|------------------------------|-------------------------------------|------------------------------------------|------------------------------------------|
| Treatment                       | 90 mg SC;<br>D0, 1, 2<br>n=14 | 90 mg IM;<br>D0, D7;<br>n=14                                   | Treatment                         | 120 mg SC;<br>D0, D1;<br>n=8 | 120 (2x60) mg SC;<br>D0, D1;<br>n=8 | 120 (2x60) mg SC;<br>D0, D1, D2;<br>n=18 | 180 (2x90) mg SC;<br>D0, D1, D2;<br>n=20 |
| (ng.h/mL)                       |                               | (86.1)<br>Dose 2: 9377<br>(20.0)                               | (ng/mL)                           |                              |                                     |                                          |                                          |
| AUC(all)                        | -                             | 10480<br>(27.3)                                                | C <sub>max</sub> Late<br>(ng/mL)  | 11.1<br>(31.5)               | 9.56 (15.7)                         | 15.09 (62.06)                            | 23.2 (49.34)                             |
| AUC(all $\infty$ )<br>(ng.h/mL) | -                             | 11510<br>(24.6)                                                | AUC(0-t)<br>(Dose 1)<br>(ng.h/mL) | 189.0<br>(35.2)              | 272.7 (37.4)                        | 209.0 (52.8)                             | 450.0 (141.0)                            |
| T <sub>1/2</sub> elim<br>(h)    | 1086.71<br>(593.33)           | Dose 1: 166.60<br>(72.9)<br>Dose 2: 404.43<br>(113.15)         | AUC(0-t) (Dose 2)<br>(ng.h/mL)    | 6331<br>(47.8)               | 7605 (21.2)                         | 377.0 (65.2)                             | 557.0 (55.8)                             |
| CL/F<br>(mL/h)                  | -                             | 14940<br>(3720)                                                | AUC(0-t) (Dose 3)<br>(ng.h/mL)    | NA                           | NA                                  | 11100.0 (68.0)                           | 16000.0 (48.8)                           |
| T <sub>max</sub> (obs)<br>(h)   | 2.00<br>(0.97-9.98)           | Dose 1: 2.00<br>(1.00, 24.00)<br>Dose 2: 1.00<br>(1.00, 24.00) | AUC(all)<br>(ng.h/mL)             | 6530<br>(47.0)               | 7889 (21.0)                         | 12094.07 (57.14)                         | 17827.78 (47.45)                         |
|                                 |                               |                                                                | AUC(0- $\infty$ )<br>(ng.h/mL)    | 8522<br>(28.0)               | 8401 (23.5)                         | 13348.74 (58.05)                         | 19920.18 (37.97)                         |
|                                 |                               |                                                                | AUC(all $\infty$ )<br>(ng.h/mL)   | 8747<br>(27.5)               | 8685 (22.5)                         | -                                        | -                                        |
|                                 |                               |                                                                | T <sub>1/2</sub> elim<br>(h)      | 351.85<br>(112.06)           | 520.33 (394.9)                      | 512.97 (65.52)                           | 460.13 (38.05)                           |
|                                 |                               |                                                                | CL/F                              | 28250<br>(7625)              | 27730 (6450)                        | 26968.84 (58.05)                         | 27108.19 (37.97)                         |

| Parameter | EP-24332T-A013              | EP-24332T-A014               | Parameter                                | ARD-0301-003                 | ARD-0301-008                        | ARD-0301-010                             |                                          |
|-----------|-----------------------------|------------------------------|------------------------------------------|------------------------------|-------------------------------------|------------------------------------------|------------------------------------------|
| Treatment | 90 mg SC;<br>D0,1,2<br>n=14 | 90 mg IM;<br>D0, D7;<br>n=14 | Treatment                                | 120 mg SC;<br>D0, D1;<br>n=8 | 120 (2x60) mg SC;<br>D0, D1;<br>n=8 | 120 (2x60) mg SC;<br>D0, D1, D2;<br>n=18 | 180 (2x90) mg SC;<br>D0, D1, D2;<br>n=20 |
|           |                             |                              | (mL/h)                                   |                              |                                     |                                          |                                          |
|           |                             |                              | T <sub>max</sub> <sub>Init1</sub><br>(h) | 2.00<br>(1.00,4.00)          | 2.00 (1.00, 2.00)                   | 2.0 (1.0, 21.2)                          | 2.0 (1.0, 10.0)                          |
|           |                             |                              | T <sub>max</sub> <sub>Init2</sub><br>(h) | 2.00<br>(1.00,6.00)          | 2.00 (1.00, 6.00)                   | 2.0 (1.0, 23.8)                          | 4.0 (1.0, 23.9)                          |
|           |                             |                              | T <sub>max</sub> <sub>Init3</sub><br>(h) | NA                           | NA                                  | 2.0 (1.0, 624.0)                         | 2.0 (1.0, 456.0)                         |
|           |                             |                              | T <sub>max</sub> <sub>Late</sub><br>(h)  | 311.87<br>(47.68,<br>551.67) | 311.80 (143.87,<br>648.00)          | 336.58 (93.0,<br>670.0)                  | 335.72 (94.0,<br>890.0)                  |

AUC=area under the curve; CL/F=oral clearance; C<sub>max</sub>=maximal concentration; D=day; h=hour; IM=intramuscular; Init1, 2 or 3=relative to the first, second or third dose; NA, non-applicable; SC=subcutaneous; T<sub>max</sub>= time of maximum observed concentration; T<sub>1/2elim</sub>= terminal elimination half-life  
Data are geometric mean (CV%) for C<sub>max</sub> and AUC; arithmetic mean (SD) for T<sub>1/2elim</sub> and CL/F; median (range) for T<sub>max</sub>

**Supplemental Table S3. Formal injection site inspection**

| Injection site reaction | ARD-0301-003: 120 mg SC<br>N=8 |                   | ARD-0301-008: 2x60 mg SC<br>N=8                                      |                                                                      | ARD-0301-010: 120 (2x60) mg SC<br>N=18                               |                                                          |                                                      | ARD-0301-010: 180 (2x90) mg SC<br>N=20                             |                                                      |                                                      |
|-------------------------|--------------------------------|-------------------|----------------------------------------------------------------------|----------------------------------------------------------------------|----------------------------------------------------------------------|----------------------------------------------------------|------------------------------------------------------|--------------------------------------------------------------------|------------------------------------------------------|------------------------------------------------------|
|                         | D0 injection site              | D1 injection site | D0 injection site                                                    | D1 injection site                                                    | D0 injection site                                                    | D1 injection site                                        | D2 injection site                                    | D0 injection site                                                  | D1 injection site                                    | D2 injection site                                    |
| Redness                 | 3 (37.5)                       | 0                 | Injection site 1: 0<br>Injection site 2: 0                           | Injection site 1: 0<br>Injection site 2: 0                           | Injection site 1: 0<br>Injection site 2: 0                           | Injection site 1: 0<br>Injection site 2: 0               | Injection site 1: 0<br>Injection site 2: 0           | Injection site 1: 1 (5)<br>Injection site 2: 2 (10)                | Injection site 1: 0<br>Injection site 2: 0           | Injection site 1: 0<br>Injection site 2: 0           |
| Swelling                | 3 (37.5)                       | 0                 | Injection site 1: 0<br>Injection site 2: 0                           | Injection site 1: 0<br>Injection site 2: 0                           | Injection site 1: 0<br>Injection site 2: 0                           | Injection site 1: 0<br>Injection site 2: 0               | Injection site 1: 0<br>Injection site 2: 0           | Injection site 1: 1 (5)<br>Injection site 2: 0                     | Injection site 1: 0<br>Injection site 2: 0           | Injection site 1: 0<br>Injection site 2: 0           |
| Induration              | 6 (75.0)                       | 5 (62.5)          | Injection site 1: 8 (100%)<br>Injection site 2: 8 (100%)             | Injection site 1: 8 (100%)<br>Injection site 2: 8 (100%)             | Injection site 1: 8 (44.4)<br>Injection site 2: 8 (44.4)             | Injection site 1: 8 (44.4)<br>Injection site 2: 8 (44.4) | Injection site 1: 9 (50)<br>Injection site 2: 9 (50) | Injection site 1: 11 (55)<br>Injection site 2: 9 (45)              | Injection site 1: 9 (45)<br>Injection site 2: 9 (45) | Injection site 1: 8 (40)<br>Injection site 2: 8 (40) |
| Pain                    | 0                              | 0                 | Injection site 1: 6 (75%) (mild)<br>Injection site 2: 6 (75%) (mild) | Injection site 1: 2 (25%) (mild)<br>Injection site 2: 2 (25%) (mild) | Injection site 1: 1 (5.6) (mild)<br>Injection site 2: 1 (5.6) (mild) | Injection site 1: 0<br>Injection site 2: 0               | Injection site 1: 0<br>Injection site 2: 0           | Injection site 1: 3 (15) (mild)<br>Injection site 2: 3 (15) (mild) | Injection site 1: 0<br>Injection site 2: 0           | Injection site 1: 0<br>Injection site 2: 1 (5)       |

| Injection site reaction | ARD-0301-003: 120 mg SC<br>N=8 |                   | ARD-0301-008: 2x60 mg SC<br>N=8            |                                            | ARD-0301-010: 120 (2x60) mg SC<br>N=18 |                   |                   | ARD-0301-010: 180 (2x90) mg SC<br>N=20 |                                                     |                   |
|-------------------------|--------------------------------|-------------------|--------------------------------------------|--------------------------------------------|----------------------------------------|-------------------|-------------------|----------------------------------------|-----------------------------------------------------|-------------------|
|                         | D0 injection site              | D1 injection site | D0 injection site                          | D1 injection site                          | D0 injection site                      | D1 injection site | D2 injection site | D0 injection site                      | D1 injection site                                   | D2 injection site |
| Itching                 | 0                              | 0                 | Injection site 1: 0<br>Injection site 2: 0 | Injection site 1: 0<br>Injection site 2: 0 | 0                                      | 0                 | 0                 | 0                                      | Injection site 1: 1 (5)<br>Injection site 2: 2 (10) | 0                 |

D=day; IM=intramuscular; SC=subcutaneous
